# Supplementary material for: Nattokinase Attenuates Retinal Neovascularization Via Modulation of Nrf2/HO-1 and Glial Activation
Source: PubMed Central journal article supplement — Invest Ophthalmol Vis Sci. 2021 May 25;62(6):25. doi: 10.1167/iovs.62.6.25 (PMC8164371; doi:10.1167/iovs.62.6.25), 2021-05-25
Supplement: iovs-62-6-25_s001.pdf [file iovs-62-6-25_s001.pdf]

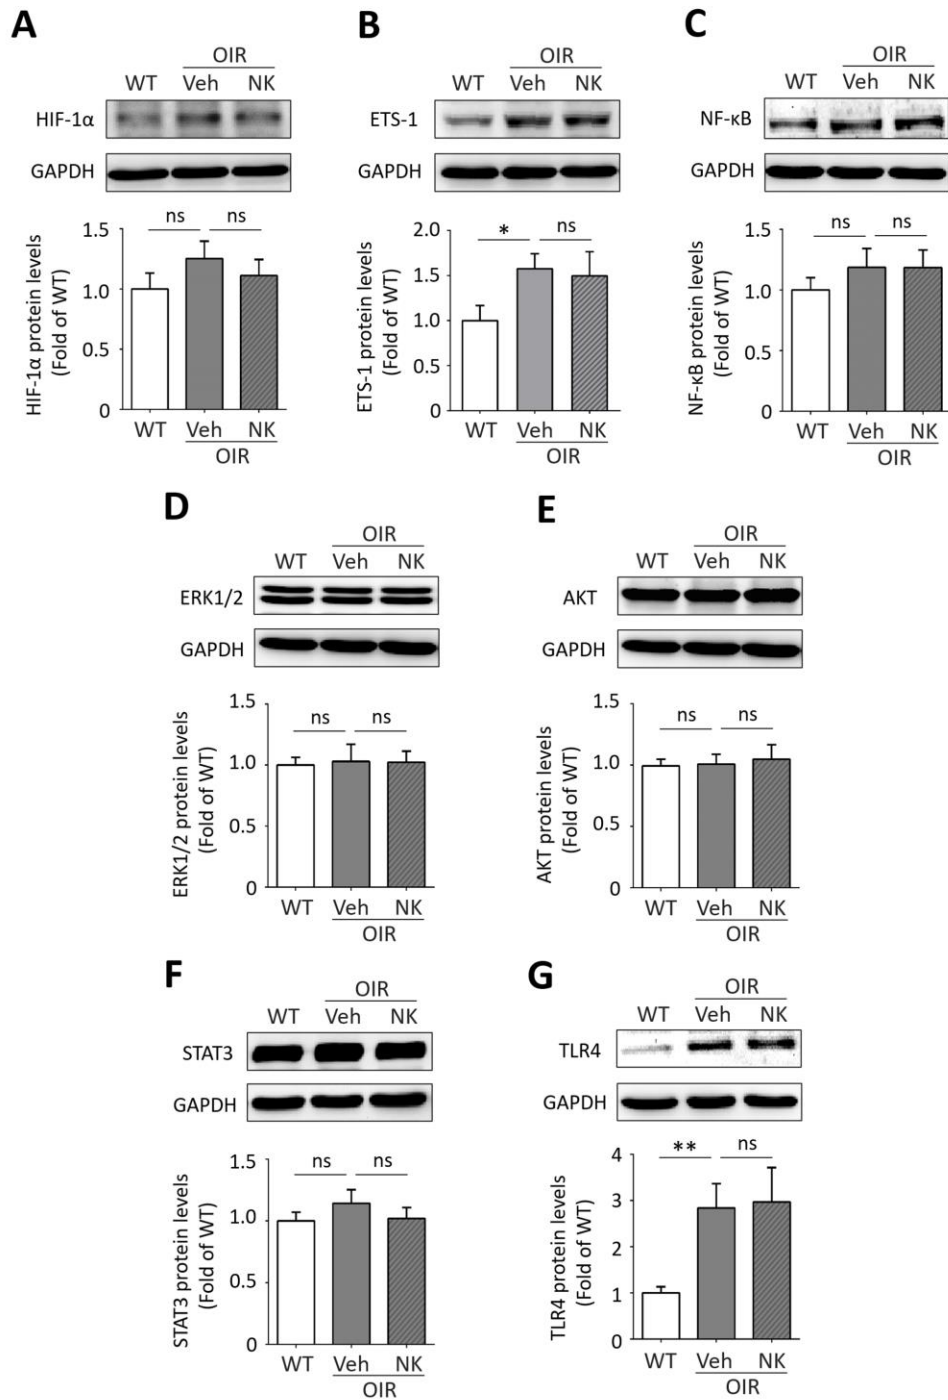

**Supplementary Figure 1.** Protein levels of several angiogenesis and inflammation related factors in retina of OIR mice at P17 after Nattokainse (NK) treatment. Protein levels of HIF-1 $\alpha$  (A), ETS-1 (B), NF- $\kappa$ B (C), ERK (D), AKT (E), STAT3 (F), and TLR4 (G) were evaluated. Note that expression of ETS-1 and TLR4 was increased in the OIR compared with wildtype. Treatment of

NK had no impact on expression of these factors.

HIF-1 $\alpha$ , Hypoxia-inducible factor 1-alpha, ETS-1, E-twenty six-1, STAT3, signal transducers and activators of transcription 3, TLR4, Toll-like receptor 4. Data are shown as mean  $\pm$  SD. ns, no significance. \* $P < 0.05$ , \*\* $P < 0.01$ .
